# Supplementary material for: Clinical patterns, recovery time and prolonged impact of COVID-19 illness in international athletes: the UK experience
Source: HighWire-hosted journal article supplement (doi:10.1136/bjsports-2021-104392), 2021-08-02
Supplement: bjsports-2021-104392supp001_data_supplement.pdf [file bjsports-2021-104392supp001_data_supplement.pdf]

**Table S1.** Athlete characteristics and COVID-19 symptom patterns by confirmed or probable diagnosis. Percentages are of the total number of cases (n=147).

|                                |                                             | All Cases<br>N=147 | Confirmed<br>N=71 | Probable<br>N=76 | Significance<br>(p value) †† |
|--------------------------------|---------------------------------------------|--------------------|-------------------|------------------|------------------------------|
| Age [mean (SD)]                |                                             | 24.7 (5.2)         | 24.3 (4.9)        | 24.9 (5.5)       | ---                          |
| Duration (Days)<br>[mean (SD)] | Symptoms                                    | 10 (6 - 17)        | 10 (6 - 16)       | 11 (7 - 18)      | 0.278                        |
|                                | Time-loss                                   | 18 (12 - 30)       | 18 (14 - 28.5)    | 18 (10 - 30.25)  | 0.500                        |
| Gender                         | Male: Female                                | 92:55              | 49:22             | 43:33            | 0.166                        |
| Sport Type                     | Summer Sport                                | 136 (93%)          | 66 (45%)          | 70 (48%)         | 0.907                        |
|                                | Winter Sport                                | 11 (7%)            | 5 (3%)            | 6 (4%)           |                              |
|                                | Able-bodied Sport                           | 122 (83%)          | 61 (41%)          | 61 (41%)         | 0.489                        |
|                                | Paralympic Sport                            | 25 (17%)           | 10 (7%)           | 15 (10%)         |                              |
| Co-morbidities                 | No co-morbidities                           | 113 (77%)          | 59 (40%)          | 54 (37%)         | 0.041 †                      |
|                                | At least one co-morbidity                   | 34 (23%)           | 12 (8%)           | 22 (15%)         |                              |
|                                | Asthma                                      | 26 (18%)           | 9 (6%)            | 17 (12%)         | 0.186                        |
|                                | Chronic respiratory disease                 | 3 (2%)             | 2 (1%)            | 1 (1%)           | 0.953                        |
|                                | Previous steroid therapy/Immunosuppressants | 3 (2%)             | 2 (1%)            | 1 (1%)           | 0.953                        |
| Symptoms                       | Fatigue                                     | 84 (57%)           | 41 (28%)          | 43 (29%)         | 0.475                        |
|                                | Dry Cough                                   | 73 (50%)           | 26 (18%)          | 47 (32%)         | 0.115                        |
|                                | Headache                                    | 68 (46%)           | 36 (24%)          | 32 (22%)         | 0.178                        |
|                                | Fever                                       | 60 (41%)           | 28 (19%)          | 32 (22%)         | 0.851                        |
|                                | Sore Throat                                 | 43 (29%)           | 16 (11%)          | 27 (18%)         | 0.379                        |
|                                | Myalgia/Arthralgia                          | 42 (29%)           | 23 (16%)          | 19 (13%)         | 0.226                        |
|                                | Anosmia/Dysgeusia                           | 34 (23%)           | 20 (14%)          | 14 (10%)         | 0.123                        |
|                                | Dyspnoea                                    | 26 (18%)           | 6 (4%)            | 20 (14%)         | 0.037 †                      |
|                                | Diarrhoea                                   | 6 (4%)             | 0 (0%)            | 6 (4%)           | 0.035 †                      |
|                                | Nausea                                      | 6 (4%)             | 2 (1%)            | 4 (3%)           | 0.880                        |
|                                | Chest Pain                                  | 5 (3%)             | 3 (2%)            | 2 (1%)           | 0.696                        |
|                                | Dizziness                                   | 4 (3%)             | 2 (1%)            | 2 (1%)           | 1.000                        |
|                                | Abdominal Pain                              | 3 (2%)             | 0 (0%)            | 3 (2%)           | 0.257                        |
| Phenotype                      | Upper Respiratory focus                     | 54 (37%)           | 31 (21%)          | 23 (16%)         | 0.130                        |
|                                | Cough                                       | 37 (25%)           | 15 (10%)          | 22 (15%)         | 0.367                        |
|                                | Non-specific                                | 27 (18%)           | 20(14%)           | 8 (5%)           | 0.012 †                      |
|                                | Lower Respiratory focus                     | 26 (18%)           | 5 (3%)            | 20 (14%)         | 0.004 †                      |
|                                | Gastrointestinal                            | 3 (2%)             | 0 (0%)            | 3 (2%)           | 0.246                        |

† Denotes significant p value

†† Significance determined using the appropriate test as specified in the main paper statistical analysis methodology

The majority of ‘probable’ COVID-19 cases occurred in the first wave of the UK epidemic when diagnostic testing wasn’t available outside the hospital setting (see Figure 1). When comparing the probable and confirmed COVID-19 cases, there was no difference in duration of symptoms. The only differences were in the symptoms & phenotypes i.e., a lower prevalence of lower respiratory phenotype, and higher prevalence of the non-specific phenotype in the confirmed cases, driven by a lower prevalence of dyspnoea in the confirmed cases. These few differences aside, the comparability of disease course in our ‘probable’ vs ‘confirmed’ cases is consistent with findings that the clinical presentation associated with B.1.1.7 variant, predominant during the UK second wave, is similar to that of the first wave variants<sup>1</sup>.

The only difference in demographics affected between probable and confirmed cases is that a greater proportion of athletes with at least one co-morbidity were diagnosed with COVID-19 in the probable sub-group. This is consistent with athletes with a co-morbidity being instructed to take greater protective measures to reduce their exposure following the first wave of cases.

1. Graham MS, Sudre CH, May A, et al. Changes in symptomatology, reinfection, and transmissibility associated with the SARS-CoV-2 variant B.1.1.7: an ecological study. *Lancet Public Health* 2021;6(5):e335-e45. doi: 10.1016/S2468-2667(21)00055-4 [published Online First: 2021/04/12]
